# Supplementary material
Source: PubMed Central journal article supplement (PMC8790921)
Supplement: 12889_2021_12313_MOESM1_ESM.pdf [file 12889_2021_12313_MOESM1_ESM.pdf]

---

## FINAL QUESTIONNAIRE

---

### Domain I: Demographic data

---

No. Question

Q1 Age

Q2 Gender

- Male
- Female

Q3 Level of education

- Uneducated
- High school/technical school
- Bachelor's or equivalent
- Master or doctoral

Q4 Living area

- Rural
- Urban

Q5 Country

- Egypt
- Algeria
- Libya
- Sudan
- Saudi Arabia
- Emirates
- Syria
- Palestine
- Iraq
- Oman
- Morocco
- Kuwait
- Lebanon
- Qatar
- Jordan
- Yemen
- Tunisia

Q6 Have you or any of your household have been infected with COVID-19?

- Yes
  - No
- 

### Domain II: The impact of COVID-19 on the environment

*Likert scale (Strongly Disagree; Disagree; Neither Agree nor Disagree; Agree; Strongly Agree)*

Q7 Did you notice an improvement in the air quality?

Q8 Did you notice a decrease in factory gas emissions?

Q9 Did you notice an improvement in the water quality of rivers and lakes?

Q10 Did you notice a decrease in the surrounding noise?

Q11 Did you notice the numbers decreased in the tourist areas?

Q12 Did you notice that the numbers and gatherings in malls, restaurants, and stores decrease?

Q13 Did you notice that public transport is less crowded?

---

---

**Domain III: The impact of COVID-19 on pollution increase**

*Likert scale (Strongly Disagree; Disagree; Neither Agree nor Disagree; Agree; Strongly Agree)*

- 
- Q14** Did you notice an increase in the number of masks thrown on the streets?
- 
- Q15** Did you notice an increase in the number of masks thrown in rivers and lakes?
- 
- Q16** Did you notice an increase in the number of plastic gloves thrown on the streets?
- 
- Q17** Did you notice an increase in the number of plastic gloves thrown in rivers and lakes?
- 
- Q18** Did you notice an increase in the number of plastic bags thrown on the street?
- 
- Q19** Did you notice an increase in hospital waste?
- 
- Q20** Did you notice an increase in laboratories' wastes?
- 
- Q21** Did you notice an increase in special places designated for medical waste disposal (masks - gloves - hospital waste -laboratory waste)?
-
